# Supplementary material
Source: publisher figshare collection journal article supplement (https://sage.figshare.com/ndownloader/files/22810202)

Supplemental information file for:

Testing the effectiveness of correction placement and type on Instagram

*By:*

Emily K. Vraga

*University of Minnesota*

Sojung Claire Kim

*George Mason University*

John Cook

*George Mason University*

Leticia Bode

*Georgetown University*

All correspondence should be addressed to Emily K. Vraga at 338 Murphy Hall, 206 Church Street, Minneapolis, MN 55455 or via email at [ekvraga@umn.edu](mailto:ekvraga@umn.edu)

*Acknowledgements:* Funding for this study was provided by the Department of Communication at George Mason University.

Figure A1: Experimental Images

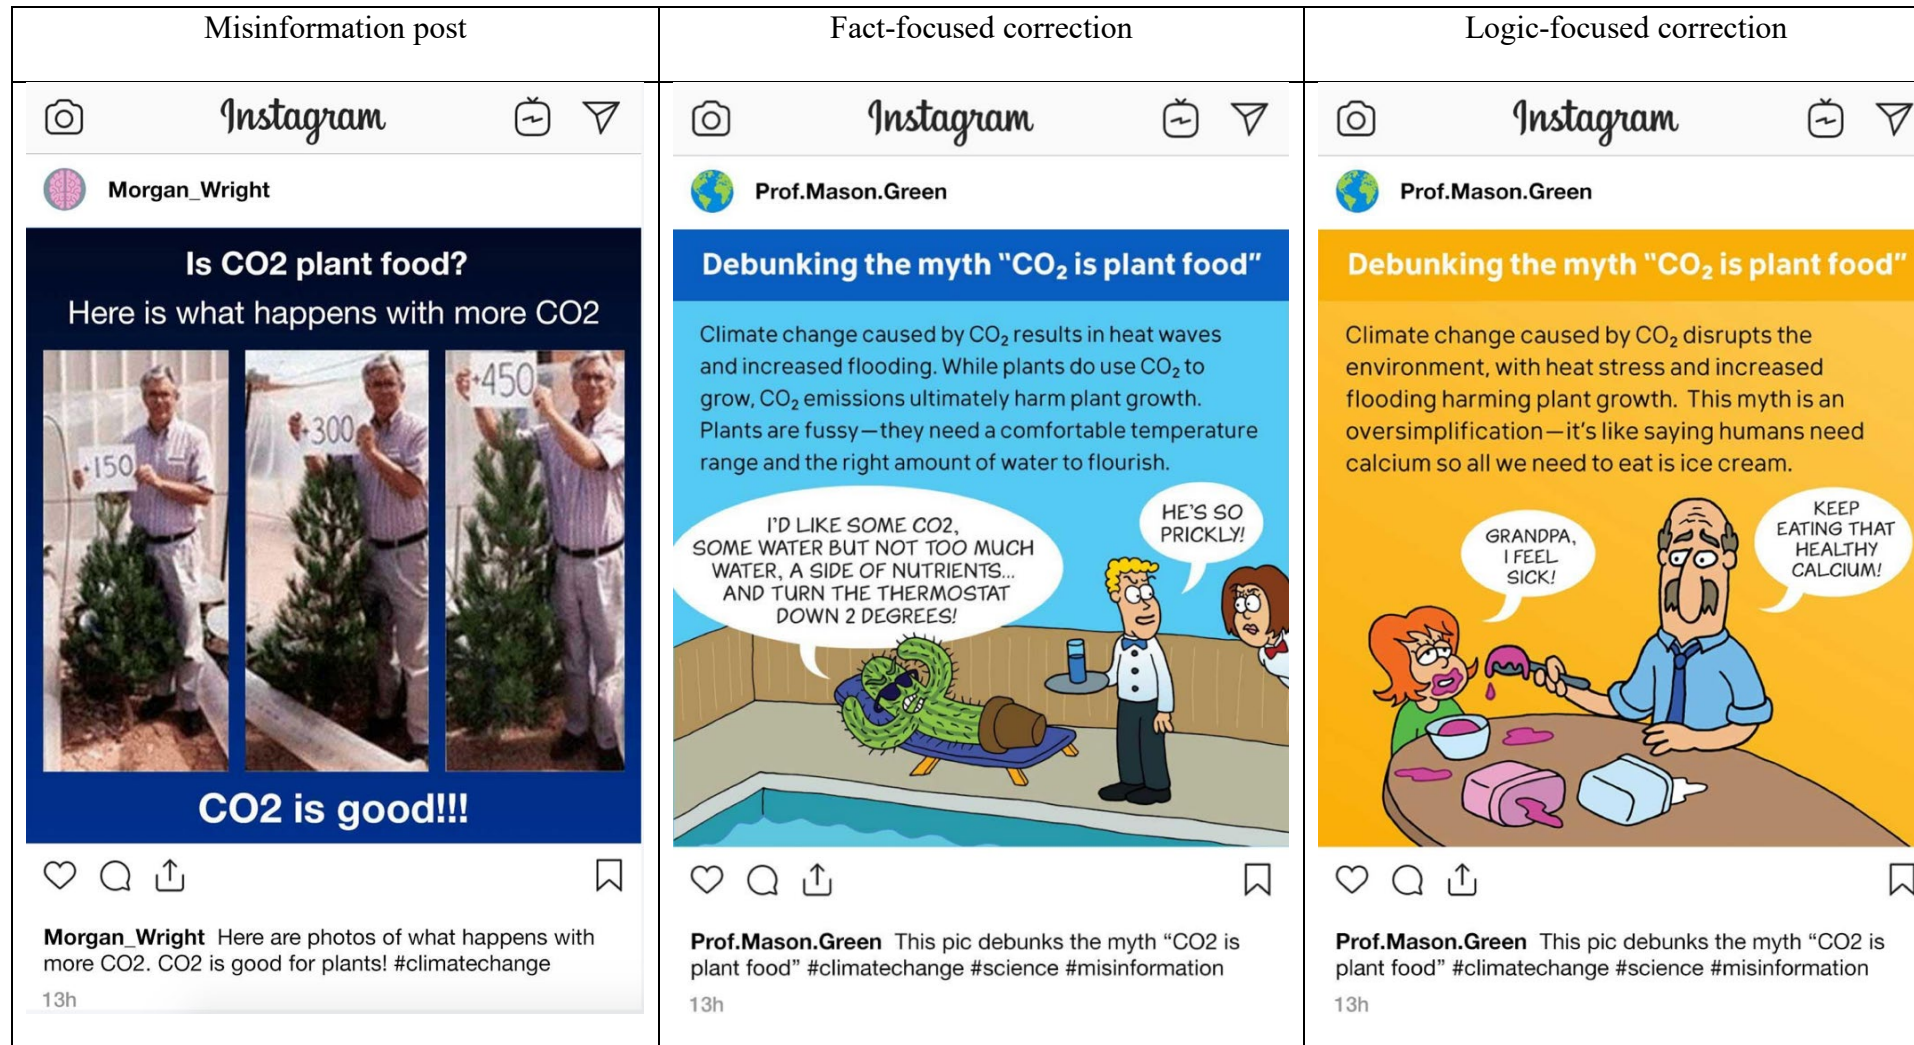

*Note.* The order of the correction posts (before vs. after) were changed for the placement manipulation.

*Table A1.* Regression model predicting plant myths comparing four correction conditions with misinformation-only condition

|                        | Plant myth |      |                   |       |      |
|------------------------|------------|------|-------------------|-------|------|
|                        | Beta       | S.E. | Standardized beta | LLCI  | ULCI |
| Logic-based prebunking | -.56       | .17  | -.14**            | -.90  | -.23 |
| Fact-based prebunking  | -.15       | .17  | -.04              | -.48  | .19  |
| Logic-based debunking  | -.71       | .17  | -.17***           | -1.05 | -.37 |
| Fact-based debunking   | -.61       | .18  | -.14**            | -.96  | -.27 |
|                        |            |      |                   |       |      |
| R <sup>2</sup>         | .026       |      |                   |       |      |

Notes: \* $p \leq .05$ , \*\* $p \leq .01$ , \*\*\* $p \leq .001$

*Table A2.* Regression model predicting misinformation credibility comparing four correction conditions with misinformation-only condition

|                        | Misinformation credibility |      |                   |      |      |
|------------------------|----------------------------|------|-------------------|------|------|
|                        | Beta                       | S.E. | Standardized beta | LLCI | ULCI |
| Logic-based prebunking | -.47                       | .17  | -.11**            | -.81 | -.14 |
| Fact-based prebunking  | -.04                       | .17  | -.01              | -.37 | .30  |
| Logic-based debunking  | -.45                       | .17  | -.11**            | -.79 | -.11 |
| Fact-based debunking   | -.30                       | .18  | -.07              | -.64 | .05  |
|                        |                            |      |                   |      |      |
| R <sup>2</sup>         | .014                       |      |                   |      |      |

Notes: \* $p \leq .05$ , \*\* $p \leq .01$ , \*\*\* $p \leq .001$

*Table A3:* Regression model comparing placement and approach as factors in predicting plant myths

|                | Plant myth |      |                   |      |      |
|----------------|------------|------|-------------------|------|------|
|                | Beta       | S.E. | Standardized beta | LLCI | ULCI |
| Logic-focused  | -.42       | .17  | -.12*             | -.74 | -.09 |
| Debunking      | -.47       | .17  | -.13*             | -.80 | -.13 |
| Interaction    | .32        | .24  | .08               | -.15 | .79  |
|                |            |      |                   |      |      |
| R <sup>2</sup> | .016       |      |                   |      |      |

Notes: \* $p \leq .05$ , \*\* $p \leq .01$ , \*\*\* $p \leq .001$

*Table A4:* Regression model comparing placement and approach as factors in predicting misinformation credibility

|                | Misinformation credibility |      |                   |      |      |
|----------------|----------------------------|------|-------------------|------|------|
|                | Beta                       | S.E. | Standardized beta | LLCI | ULCI |
| Logic-focused  | -.43                       | .16  | -.13**            | -.75 | -.12 |
| Debunking      | -.26                       | .17  | -.08              | -.59 | .07  |
| Interaction    | .28                        | .23  | .07               | -.18 | .74  |
|                |                            |      |                   |      |      |
| R <sup>2</sup> | .011                       |      |                   |      |      |

Notes: \* $p \leq .05$ , \*\* $p \leq .01$ , \*\*\* $p \leq .001$

*Table A5:* Regression model comparing placement and approach as factors in predicting correction credibility

|                | Correction credibility |      |                   |      |      |
|----------------|------------------------|------|-------------------|------|------|
|                | Beta                   | S.E. | Standardized beta | LLCI | ULCI |
| Logic-focused  | -.60                   | .14  | -.20***           | -.87 | -.32 |
| Debunking      | -.23                   | .15  | -.08              | -.52 | .06  |
| Interaction    | .51                    | .21  | .15*              | .11  | .91  |
|                |                        |      |                   |      |      |
| R <sup>2</sup> | .022                   |      |                   |      |      |

Notes: \* $p \leq .05$ , \*\* $p \leq .01$ , \*\*\* $p \leq .001$

Figure A2. The six Instagram control posts displayed in our study

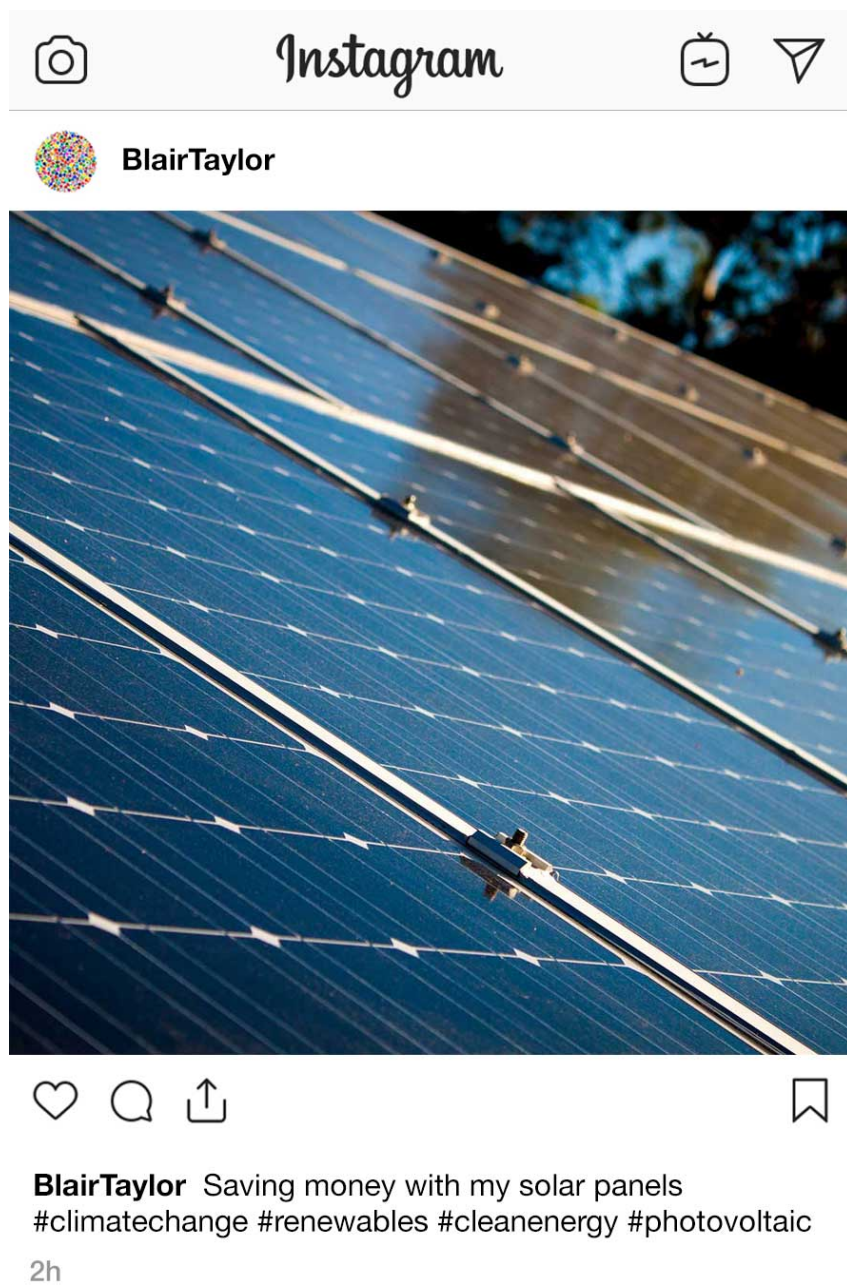

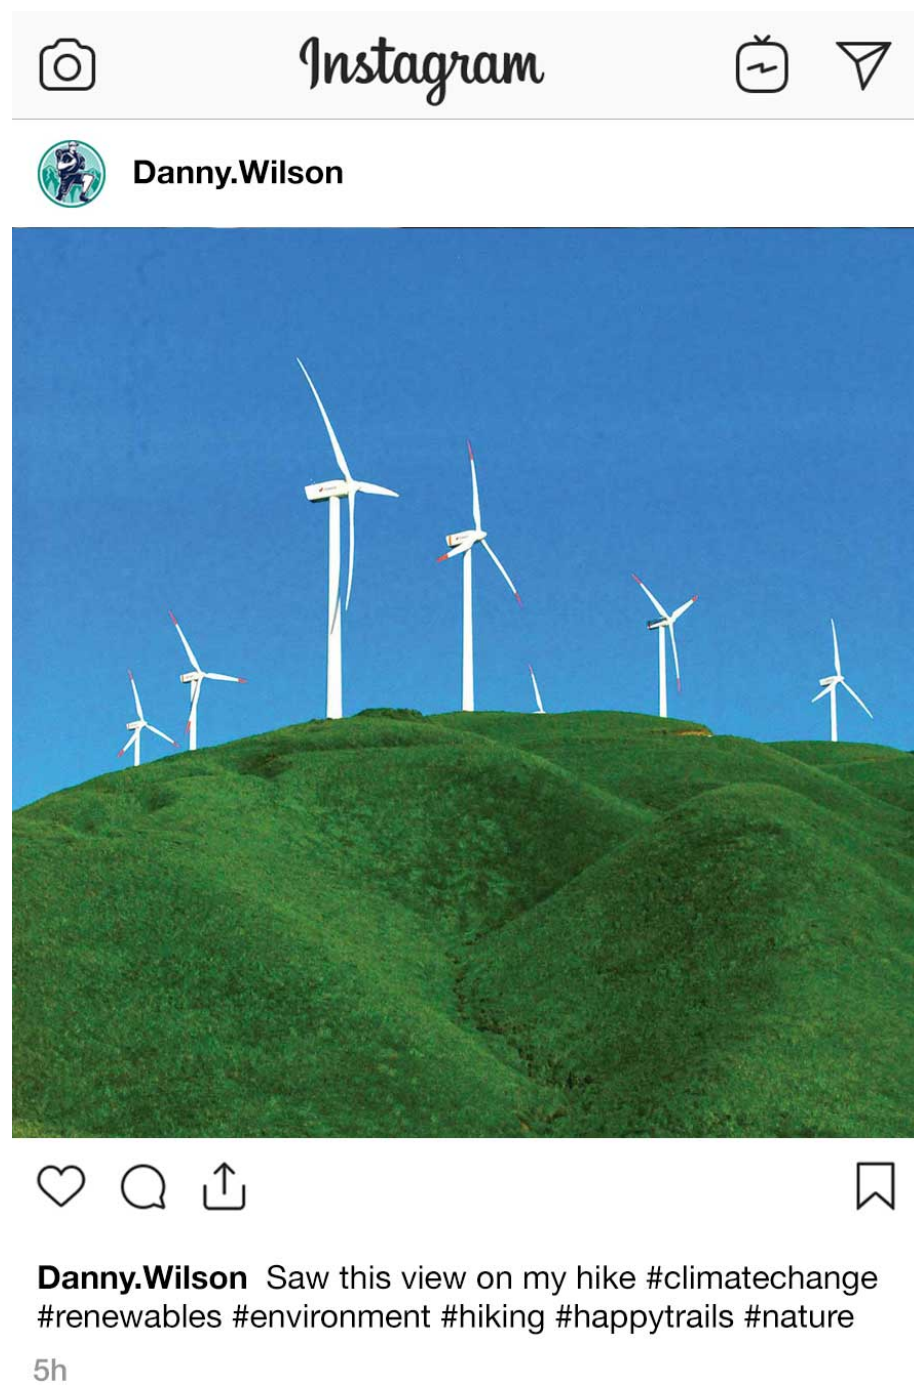

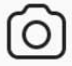

Instagram

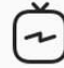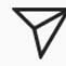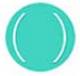

Flynn-Williams

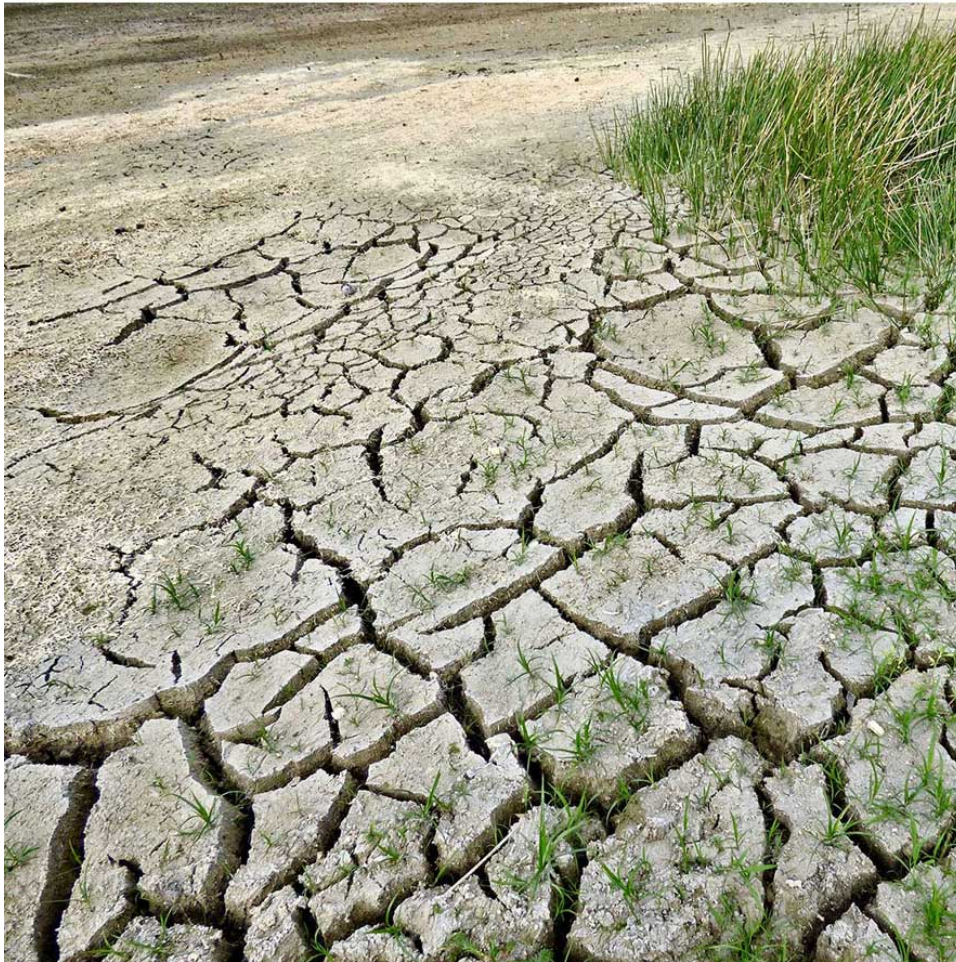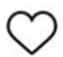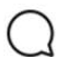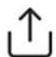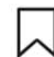

**Flynn-Williams** #climatechange causing intensified  
#drought in some regions #agriculture #watercycle

7h

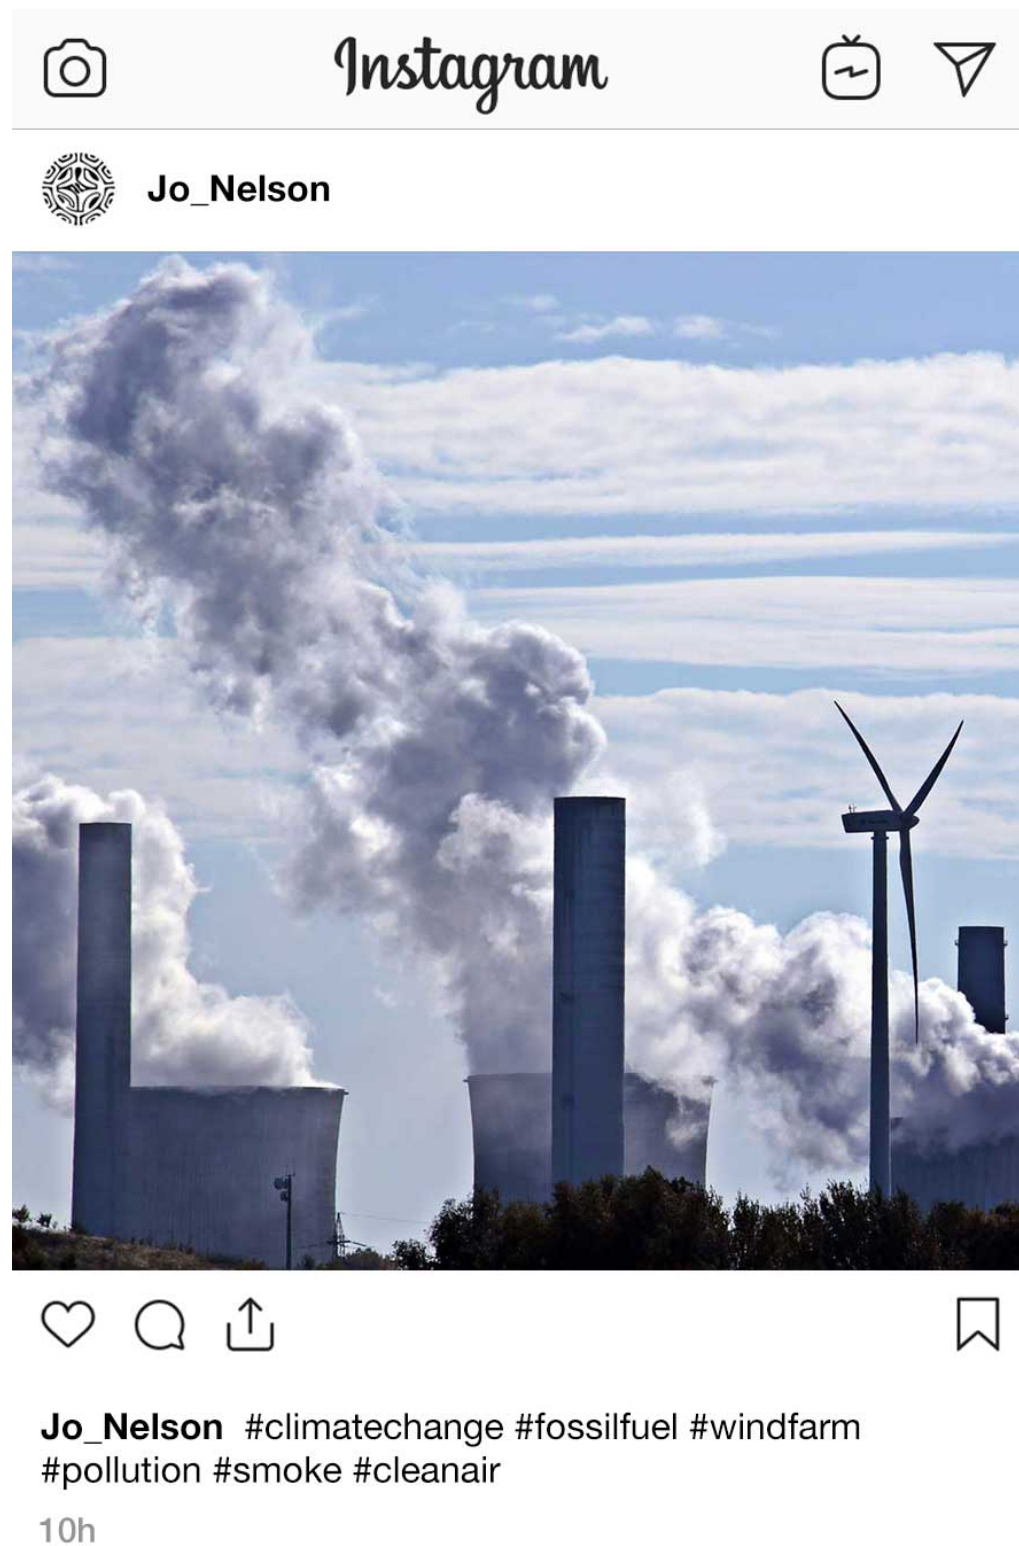

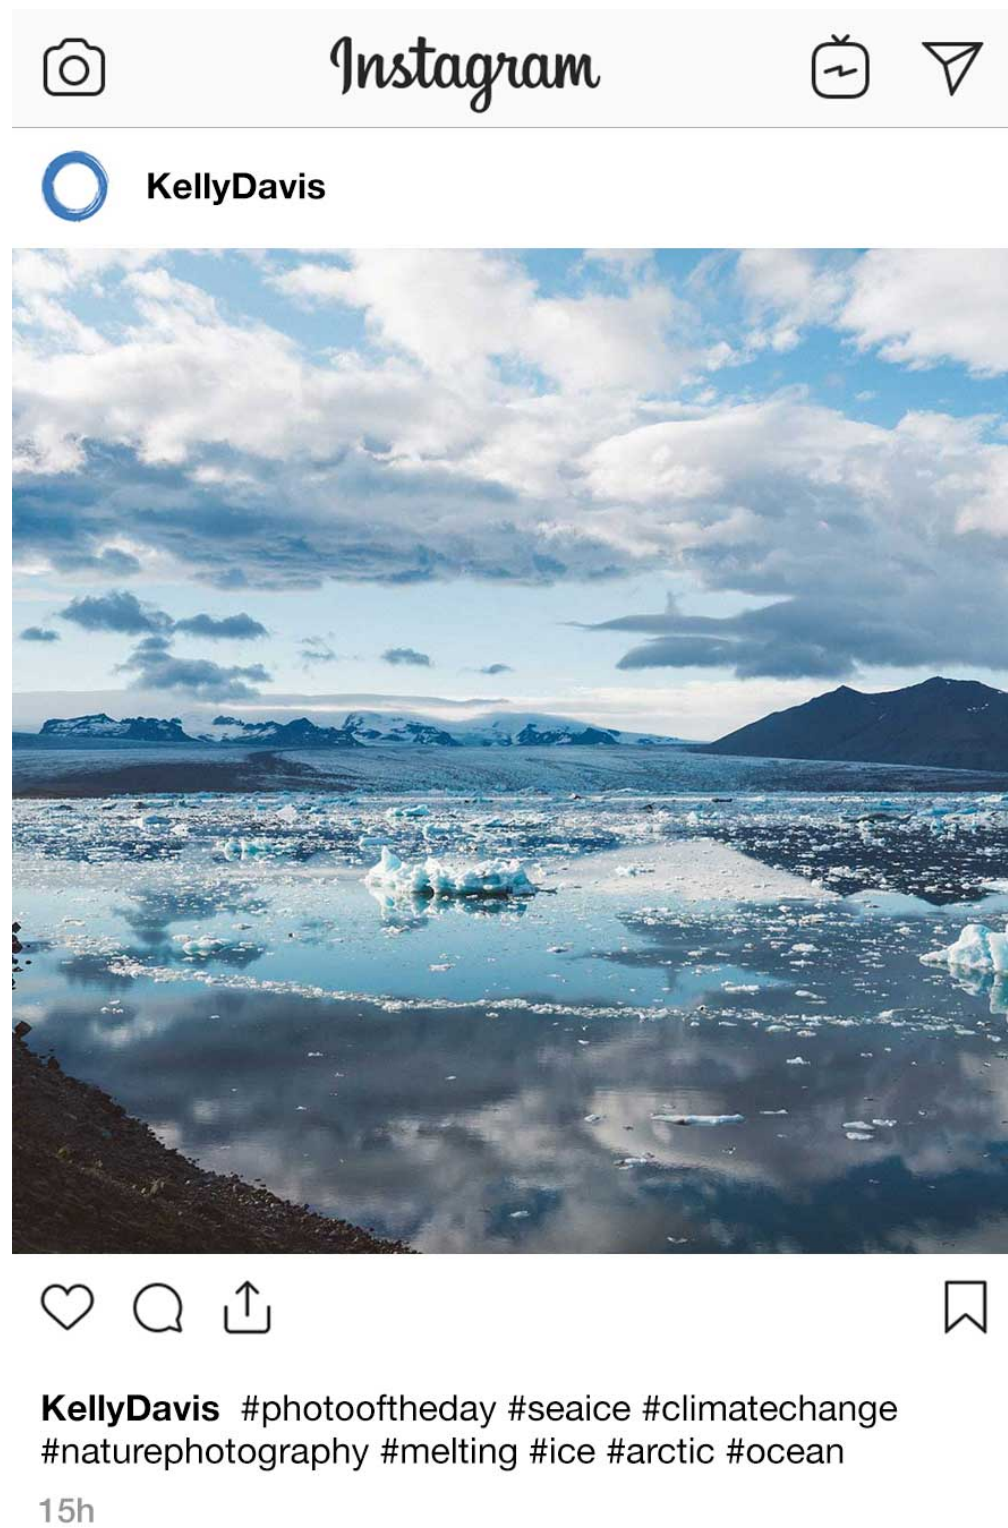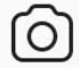

Instagram

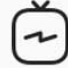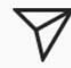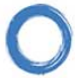

KellyDavis

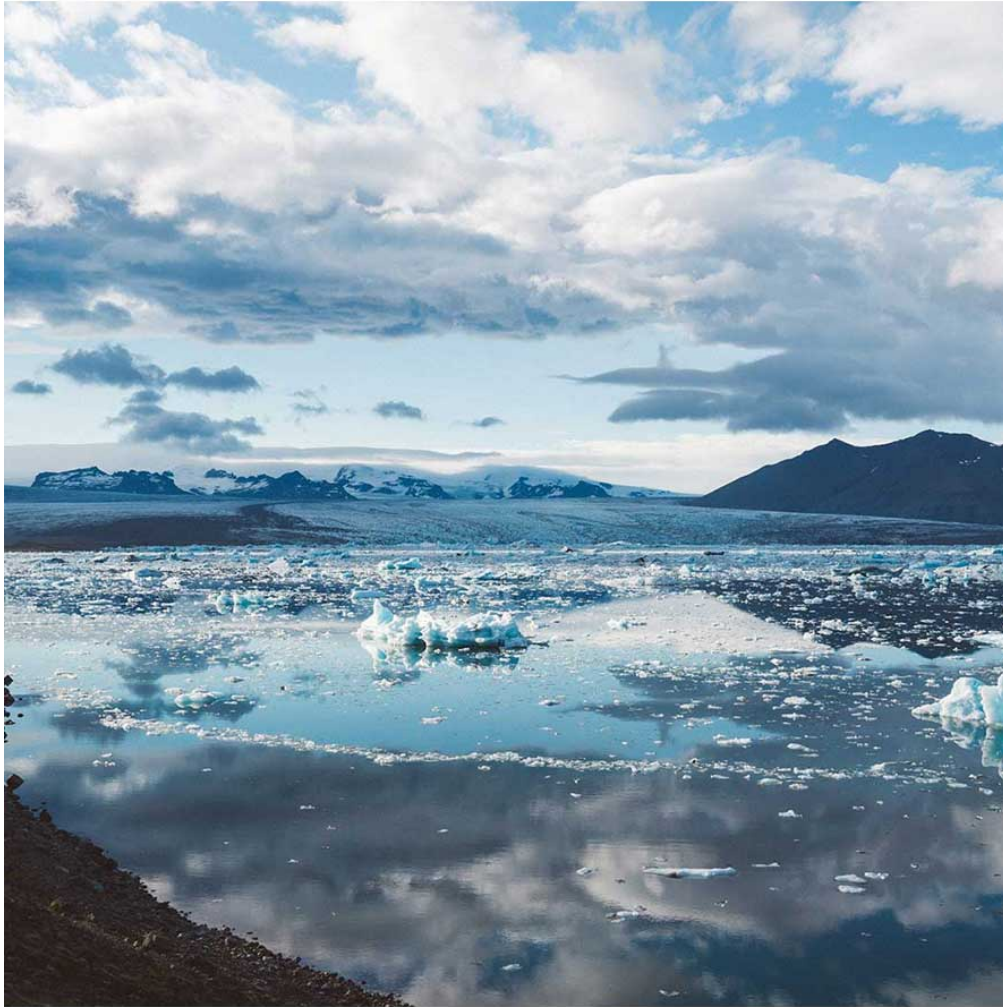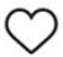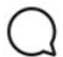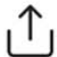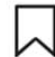

**KellyDavis** #photooftheday #seaice #climatechange  
#naturephotography #melting #ice #arctic #ocean

15h

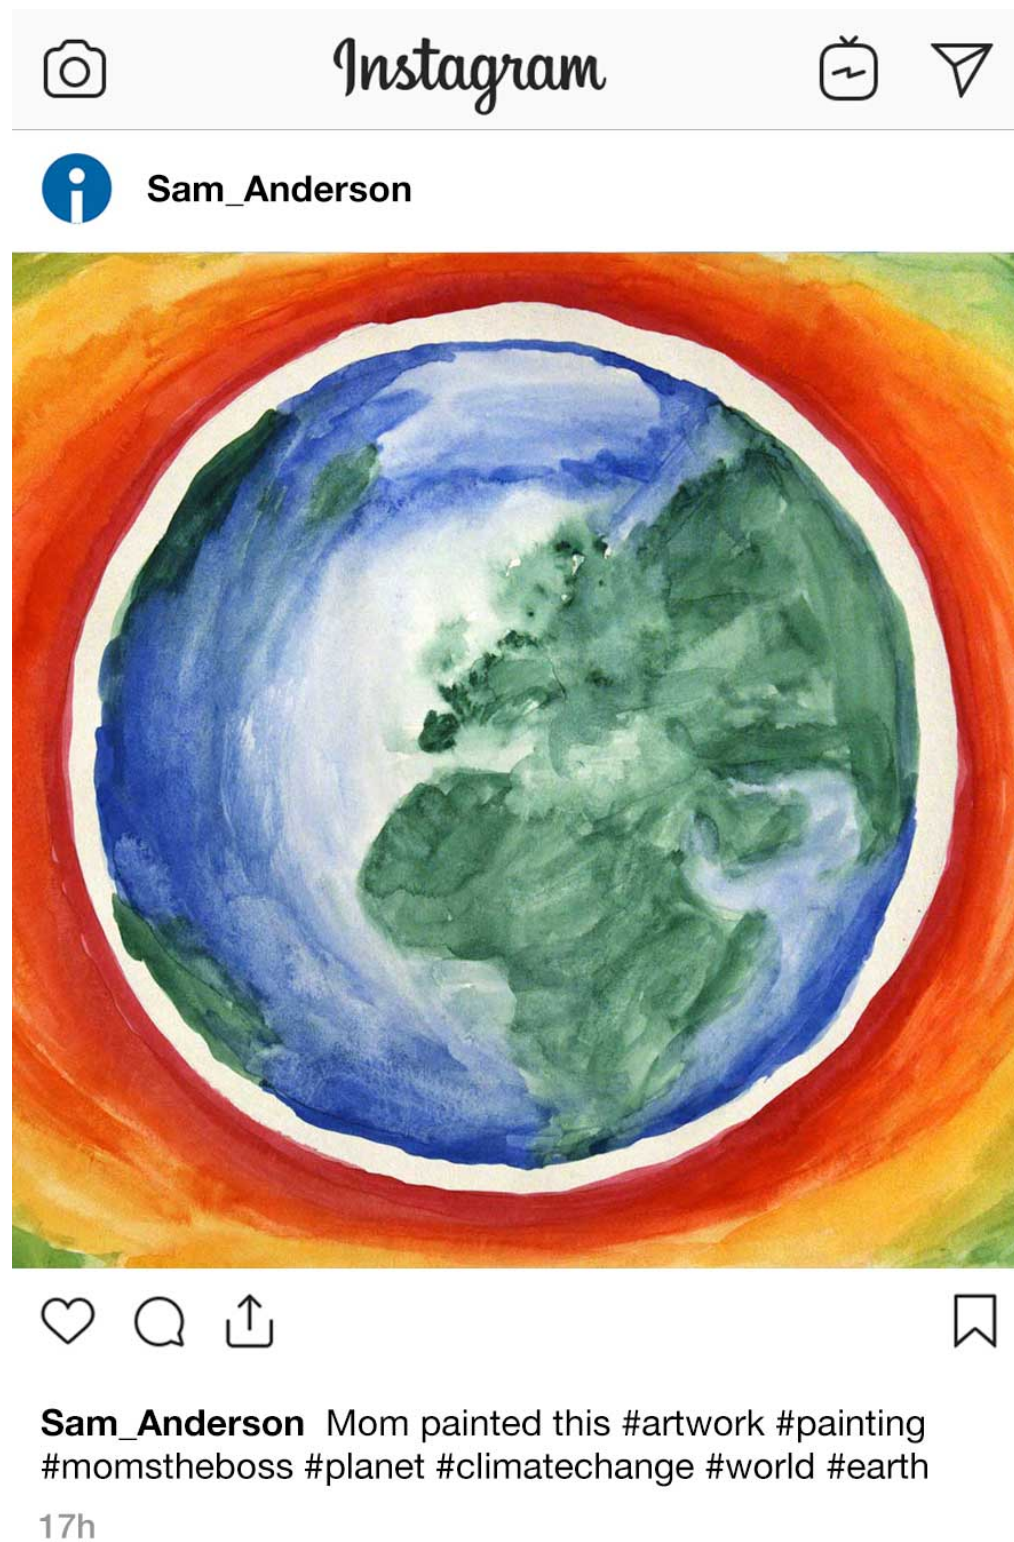

Supplement: Supplementary file 1 [file 22810202]
